# Supplementary material for: A mouse SWATH-mass spectrometry reference spectral library enables deconvolution of species-specific proteomic alterations in human tumour xenografts
Source: PubMed Central journal article supplement (PMC7375474; doi:10.1242/dmm.044586), 2020-07-14
Supplement: dmm-13-044586-s1.pdf [file dmm-13-044586-s1.pdf]

**Table S1:** Full proteomic dataset of human proteins obtained from MIND model experiment as processed by XenoSWATH species-specific deconvolution pipeline. Confidence of the protein identification is reported as FDR-adjusted p-value.

[Click here to Download Table S1](#)

**Table S2:** Full proteomic dataset of mouse proteins obtained from MIND model experiment as processed by XenoSWATH species-specific deconvolution pipeline. Confidence of the protein identification is reported as FDR-adjusted p-value.

[Click here to Download Table S2](#)

**Table S3:** List of human proteins with significantly altered expression in 10w samples compared to 4w & 6w samples. Log<sub>2</sub> fold change (Log<sub>2</sub>FC) for each protein is reported along with the FDR-adjusted p-value from the two-tailed Student's t-test.

[Click here to Download Table S3](#)

**Table S4:** List of mouse proteins with significantly altered expression in 10w samples compared to 4w & 6w samples. Log<sub>2</sub> fold change (Log<sub>2</sub>FC) for each protein is reported along with the FDR-adjusted p-value from the two-tailed Student's t-test.

[Click here to Download Table S4](#)

**Table S5:** Overlapping ontologies enriched in both human and mouse dataset (Figure 4E). GSEA normalized enrichment scores (NES) and FDR-adjusted p-values are shown based on analysis of 10w versus 4w & 6w samples.

[Click here to Download Table S5](#)

**Table S6:** Detailed Spectronaut settings used for XenoSWATH analysis

[Click here to Download Table S6](#)
